# Supplementary material for: Nanodiamond-structured zinc composite coatings with strong bonding and high load-bearing capacity
Source: Royal Society of Chemistry journal article supplement (doi:10.1039/d3na00809f), 2024-01-01
Supplement: d3na00809f1.pdf [file d3na00809f1.pdf]

### Supporting Information

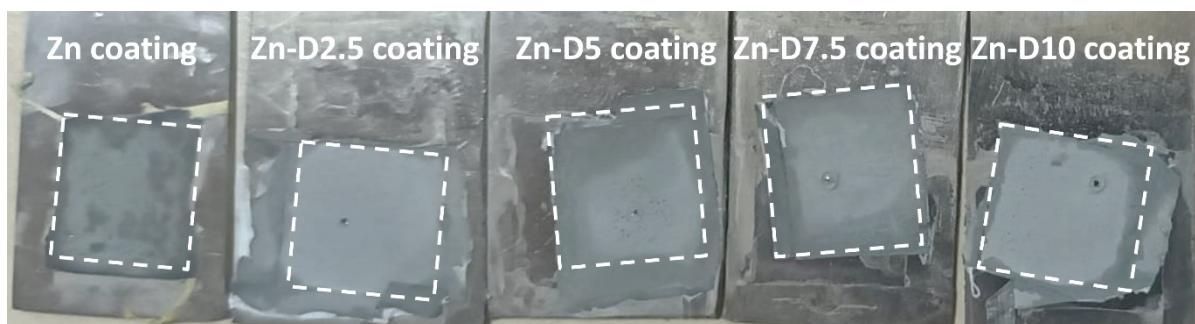

**Figure SI 1:** Digital camera images of as-prepared Zn-diamond composite coatings.
